# Supplementary material for: Metabolic engineering of TiO2 nanoparticles in Nitzschia palea to form diatom nanotubes: an ingredient for solar cells to produce electricity and biofuel
Source: Royal Society of Chemistry journal article supplement (doi:10.1039/c6ra18487a), 2016-01-01
Supplement: c6ra18487a1.pdf [file c6ra18487a1.pdf]

## Supporting Information

### Metabolic engineering of TiO<sub>2</sub> nanoparticles in *Nitzschia palea* to form diatom nanotubes: an ingredient for solar cells to produce electricity and biofuel<sup>†</sup>

Shristy Gautam<sup>1</sup>, Mrinal Kashyap<sup>1</sup>, Shradhey Gupta<sup>2</sup>, Vikas Kumar<sup>2</sup>, Benoit Schoefs<sup>3</sup>, Richard Gordon<sup>4</sup>, Clayton Jeffries<sup>5</sup>, Khashti Ballabh Joshi<sup>\*2</sup> and Vandana Vinayak<sup>\*1</sup>

<sup>1</sup>*Diatom DBT Research Lab, Department of Crim. & Forensic Science, Dr. H.S. Gour Central University, Sagar, M.P. Emails: [kapilvinayak@gmail.com](mailto:kapilvinayak@gmail.com); <sup>2</sup>Department of Chemistry, Dr. H.S. Gour Central University, Sagar, M.P.; <sup>3</sup>MicroMar, Mer Molécules Santé, IUML—FR 3473 CNRS, University of Le Mans, Faculté des Sciences et Techniques, Avenue Olivier Messiaen, 72085 Le Mans cedex 9, France; <sup>4</sup>Gulf Specimen Aquarium & Marine Laboratory, Panacea, FL 32346, USA C.S. Mott Center for Human Growth and Development, Department of Obstetrics & Gynecology, Wayne State University, 275 E. Hancock, Detroit, MI 48201, USA; <sup>5</sup>Dan F. Smith Department of Chemical Engineering, Lamar University, Beaumont, TX 77710, USA*

**TableS1.** Lifetime of sample without presence of any quencher.

| Sample           | Lifetime (ns) |
|------------------|---------------|
| Diatom           | 3.57          |
| Denatured Diatom | 3.72          |

#### Supporting Figures:

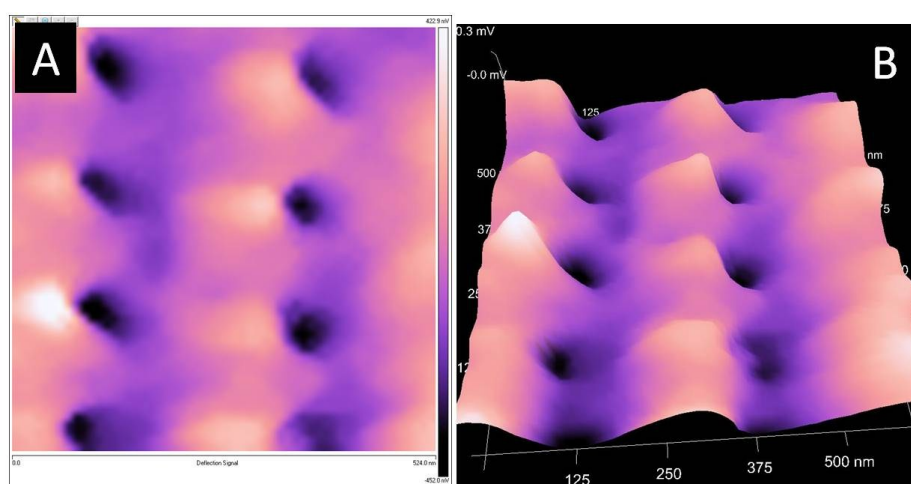

**Figure S1.** High resolution atomic force micrographs of *Nitzschia palea*, (A) control samples showing the surface morphology of diatom without feeding with Ti and (B) corresponding 3-D AFM micrograph.

**SEM IMAGES TAKEN ON DIFFERENT DAYS AFTER FEEDING WITH Ti (0.125 mM to 1.25 mM) AND Si (200 mM)**

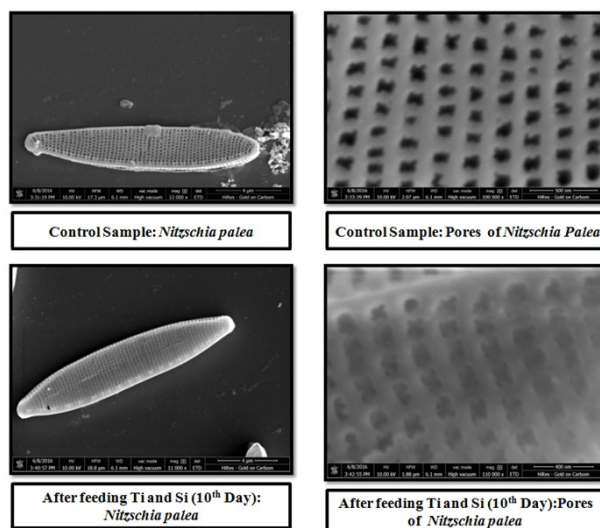

**Figure S2:** Figure depicts that the deposition of Ti on pores of *Nitzschia palea* after feeding with Titanium (0.125mM to 1.25mM (400 $\mu$ L/hr) and Silica (200 mM) (400 $\mu$ L/hr) for 10 hrs.

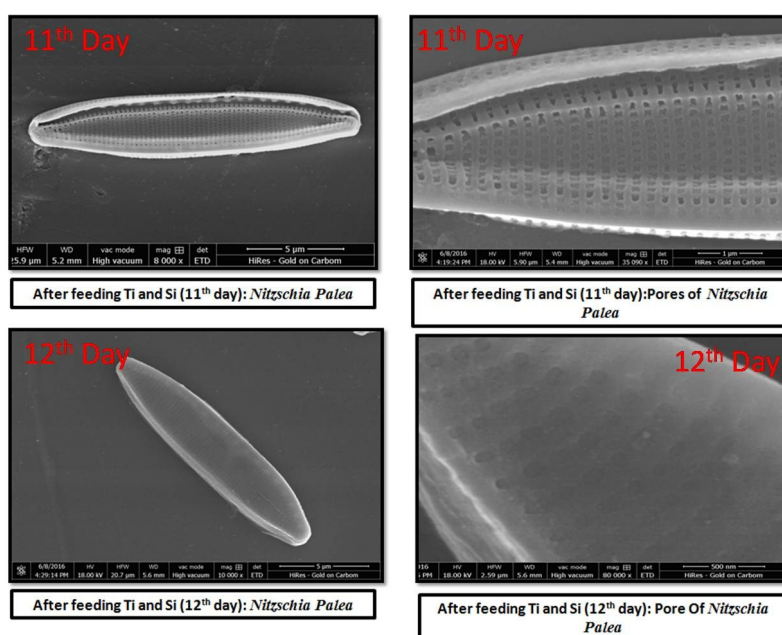

**Figure S3:** The deposition of Ti on pores of *Nitzschia palea* after feeding with Titanium (0.125mM to 1.25mM (400 $\mu$ L/hr) and Silica (200mM) (400 $\mu$ L/hr) for 10 hrs. *Top:* on 11<sup>th</sup> and *Bottom:* 12<sup>th</sup> day respectively.

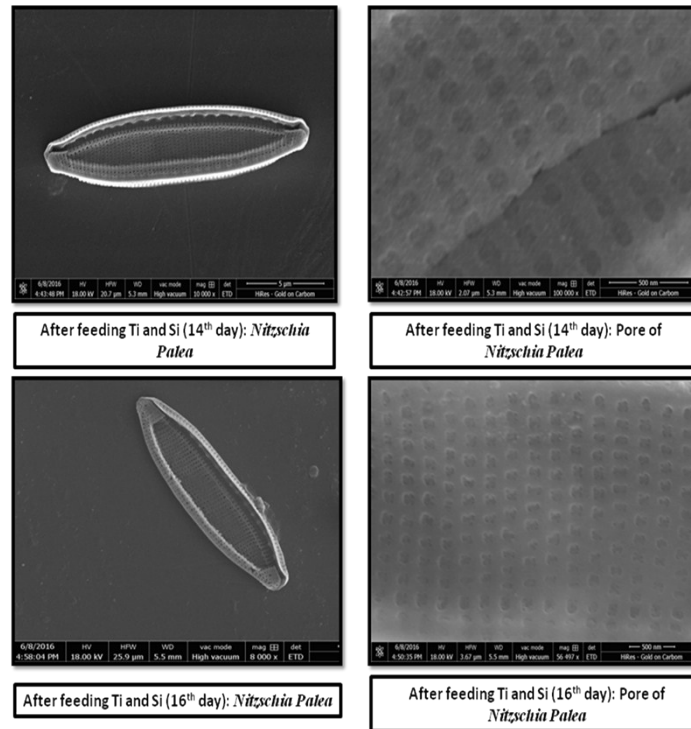

**Figure S4:** Intact and magnified images of Ti treated diatom after the after feeding with Titanium (0.125mM to 1.25mM (400 $\mu$ L/hr) and Silica (200mM) (400 $\mu$ L/hr) for 10 hrs on 14<sup>th</sup> and 16<sup>th</sup> day respectively. SEM micrograph clearly showing the deposition of Ti on pores of *Nitzschia palea*.

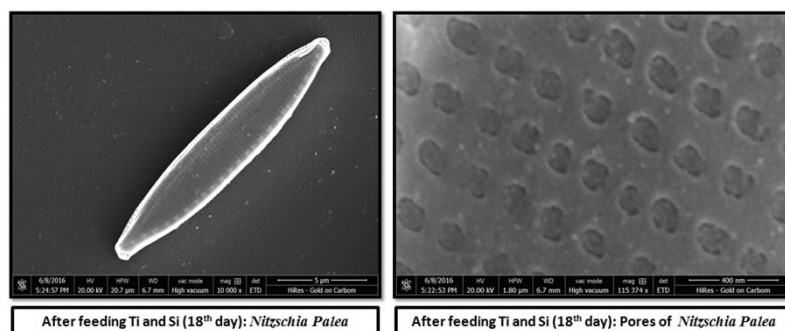

**Figure S5:** SEM micrograph of *Nitzschia palea* diatoms after feeding with Titanium (0.125mM to 1.25mM (400 $\mu$ L/hr) and Silica on 18<sup>th</sup> day. The micrograph clearly showing the deposition of Ti on pores of and adequate reduction of sizes of pores on 18<sup>th</sup> day in magnified images(right).

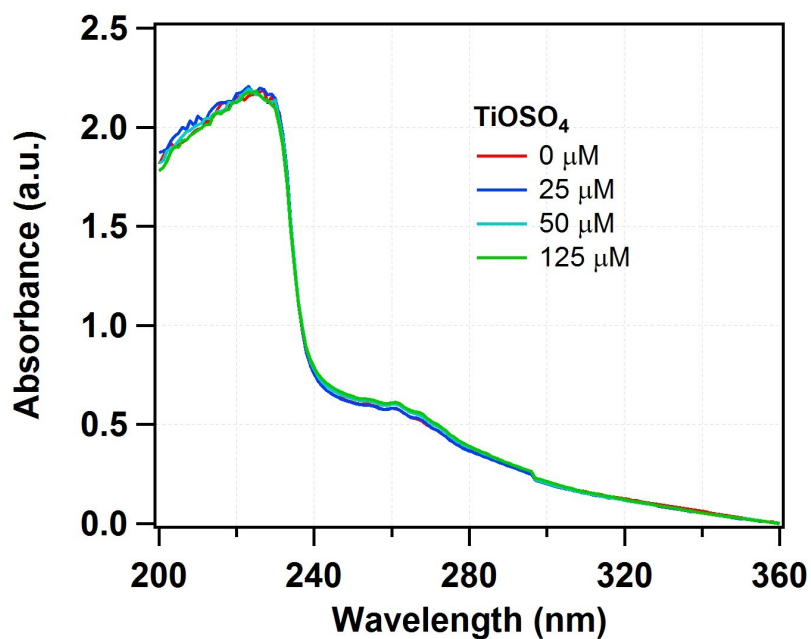

**Figure S6.** Depicts that the UV-Vis spectra of pure diatoms and diatoms in the presence of Ti, which shows the presence of tryptophan/tyrosine residue and complex formation between Ti and diatom.

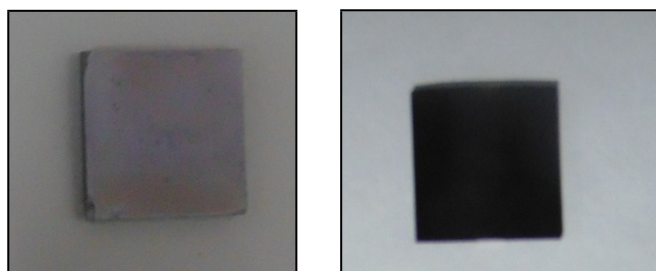

(I) FTO with  $\text{TiO}_2$  doped Frustule      (II) Carbon soot coated FTO

**Figure S7.** Depicts the electrodes constructed for DSSC; (I) shows FTO electrode with  $\text{TiO}_2$  doped diatom frustules and (II) shows carbon soot coated on FTO plate.
